# Supplementary material
Source: PubMed Central journal article supplement (PMC3511069)
Supplement: 1217554109_pnas.201217554SI.pdf [file 1217554109_pnas.201217554SI.pdf]

# Supporting Information

Kong et al. 10.1073/pnas.1217554109

## SI Results

**Construction and Characterization of a DNA Vaccine Vector Encoding an Arabinose-Dependent Regulatory Domain that Contributes to the Lysis Phenotype.** Based on our previous success with development of a programmed regulated lysis system for protective antigen delivery (1–3), we used a similar strategy to achieve an improved regulated lysis phenotype. The *Salmonella* Typhimurium host strain,  $\chi$ 8806 ( $\Delta$ *asdA19*::TT *araC* P<sub>BAD</sub> *c2* TT  $\Delta$ P<sub>*murA7*</sub>::TT *araC* P<sub>BAD</sub> *murA*) (Table S1), which features an arabinose-dependent programmed lysis phenotype, was chosen as the starting strain. The  $\Delta$ *araBAD1923* and  $\Delta$ *araE25* mutations were added sequentially using suicide vectors (Table S1), resulting in vaccine strain  $\chi$ 8807. Three additional mutations,  $\Delta$ (*gmd-fcl*)-26,  $\Delta$ *relA1123*, and  $\Delta$ *endA2311* (Table S1) were also included, resulting in recombinant attenuated *Salmonella* vaccine (RASV) strain  $\chi$ 8888 ( $\Delta$ *asdA19*::TT *araC* P<sub>BAD</sub> *c2* TT  $\Delta$ P<sub>*murA7*</sub>::TT *araC* P<sub>BAD</sub> *murA*  $\Delta$ *araBAD1923*  $\Delta$ *araE25*  $\Delta$ (*gmd-fcl*)-26  $\Delta$ *relA1123*  $\Delta$ *endA2311*) (Table S1). We then introduced the  $\Delta$ *sifA26* mutation, a defined in-frame deletion of the *sifA* gene, into strain  $\chi$ 8888 to generate strain  $\chi$ 9354. The presence of each mutation was verified by PCR. The presence of the  $\Delta$ *asdA19* mutation in *Salmonella* was confirmed by the strain's dependence on DAP for growth. The presence of the  $\Delta$ P<sub>*murA7*</sub>::TT *araC* P<sub>BAD</sub> *murA* mutation (Table S1) was verified by the strain's dependence on arabinose for growth.

We constructed a DNA vaccine vector pYA3650 (Fig. S1A and Table S1) that complemented the regulated delayed lysis strain described above. Then, pYA3650 was first introduced into the delayed regulated lysis host strains  $\chi$ 8854 and  $\chi$ 8888 (Table S1) to yield strains  $\chi$ 8854(pYA3650) and  $\chi$ 8888(pYA3650). Growth of strain  $\chi$ 8854(pYA3650) depended on arabinose (Fig. S1B). The plasmids were stably maintained for 50 or more generations when grown in the presence of arabinose and DAP. Colonization by strain  $\chi$ 8854(pYA3650) was evaluated in 8-wk-old female BALB/c mice orally inoculated with 10<sup>9</sup> CFU, a dose 50,000-times the LD<sub>50</sub> of the wild-type parent strain,  $\chi$ 3761. The strain transiently colonized lymphoid tissues (Fig. S1C) and no bacteria were recovered by 11 d after inoculation; however, nonlysis attenuated strains will persist in lymphoid tissues much longer (Fig. S1D). No arabinose-independent *Salmonella* mutants were recovered at any time during this experiment. These results indicate that a wild-type *Salmonella* strain engineered with this programmed lysis system is attenuated and is efficiently cleared from the host following colonization of lymphoid tissues.

**Regulated Programmed Lysis.** The RASV strain  $\chi$ 8888(pYA3650) grew well in LB broth supplemented with 0.02% arabinose but began to die after 1 h of incubation in LB broth without arabinose. To evaluate cell lysis, release of the cytoplasmic enzyme  $\beta$ -galactosidase into culture supernatants was used as an indicator. The *atrB13*::MudJ allele, which directs constitutive expression of  $\beta$ -galactosidase, was transduced into strain  $\chi$ 8888, resulting in strain  $\chi$ 8933 ( $\chi$ 8888 harboring *atrB13*::MudJ mutation). We then introduced plasmid pYA3650 into  $\chi$ 8933 to yield  $\chi$ 8933 (pYA3650). The ratio of  $\beta$ -galactosidase activity in the supernatant (released  $\beta$ -galactosidase) or cell pellet (retained cell-associated  $\beta$ -galactosidase) versus total  $\beta$ -galactosidase activity (supernatant plus cell pellet) indicated the extent of cell lysis. Release of  $\beta$ -galactosidase by strain  $\chi$ 8933(pYA3650) occurred only in medium lacking arabinose (Fig. S7A). Conversely, the amount of cell-associated  $\beta$ -galactosidase decreased over time when  $\chi$ 8933 (pYA3650) was grown in medium without arabinose, but no decrease was seen in media containing arabinose (Fig. S7B). These

results are consistent with our expectations for the arabinose-regulated cell lysis phenotype.

## SI Materials and Methods

**Bacterial Strains and Plasmids.** The bacterial strains and plasmids used are listed in Table S1. *S. Typhimurium* strains with *asdA* and *murA* gene deletions were grown at 37 °C in LB broth or on LB agar (4) supplemented with 50  $\mu$ g/mL DAP (5) and 0.2% arabinose. Transformants containing plasmids harboring the *araC* P<sub>BAD</sub> *asdA murA* cassette were selected on LB agar plates containing 0.2% arabinose (1). LB agar containing 5% (wt/vol) sucrose and no sodium chloride, was used for *sacB* gene-based counter selection in allelic exchange experiments (6). When required, antibiotics were added to culture media at the following concentrations: chloramphenicol, 25  $\mu$ g/mL; tetracycline, 12  $\mu$ g/mL; and kanamycin, 50  $\mu$ g/mL.

**General DNA Procedures.** DNA manipulations were carried out as described by Sambrook et al. (7). Oligonucleotide synthesis was done commercially. *Escherichia coli* and *Salmonella* were transformed by electroporation (Bio-Rad). We used suicide vector technology (8) to generate precise deletion/deletion-insertion mutations (9). Conjugational transfer of suicide vectors was performed using the suicide vector donor strain MGN617. PCR amplification was used to obtain DNA fragments for cloning and for verification of chromosomal deletion mutations. Nucleotide sequencing reactions were performed by the sequencing facility at Arizona State University, using ABI Prism fluorescent Big Dye terminators according to the instructions of the manufacturer (PE Biosystems).

**Strain Characterization.** Molecular genetic attributes of vaccine strains were confirmed by PCR with appropriate primers. LPS profiles of *Salmonella* strains were examined by previously described methods (10). Vaccine strains were compared with vector controls for stability of plasmid maintenance and arabinose-dependent growth (1).

**Construction of the Regulated Programmed Lysis *S. Typhimurium* Vaccine Host-Vector System.** The *S. Typhimurium* host strain,  $\chi$ 8806 ( $\Delta$ *asdA19*::TT *araC* P<sub>BAD</sub> *c2* TT  $\Delta$ P<sub>*murA7*</sub>::TT *araC* P<sub>BAD</sub> *murA*), which features arabinose-dependent programmed lysis phenotype, was chosen as a starting strain. The  $\Delta$ *araBAD1923* and  $\Delta$ *araE25* mutations were added sequentially using suicide vectors resulting in vaccine strain  $\chi$ 8807. Three additional mutations,  $\Delta$ (*gmd-fcl*)-26,  $\Delta$ *relA1123*, and  $\Delta$ *endA2311* mutations were also added sequentially using suicide vectors resulting in vaccine strain  $\chi$ 8888 ( $\Delta$ *asdA19*::TT *araC* P<sub>BAD</sub> *c2* TT  $\Delta$ P<sub>*murA7*</sub>::TT *araC* P<sub>BAD</sub> *murA*  $\Delta$ *araBAD1923*  $\Delta$ *araE25*  $\Delta$ (*gmd-fcl*)-26  $\Delta$ *relA1123*  $\Delta$ *endA2311*). Then we introduced the  $\Delta$ *sifA26* mutation, a defined in-frame deletion of the *sifA* gene, into strain  $\chi$ 8888 by conjugation with suicide vector pYA3716 to generate strain  $\chi$ 9354. The presence of each mutation was verified by PCR. The presence of the  $\Delta$ *asdA19* mutation in *Salmonella* was confirmed by its dependence on DAP for growth. The presence of the  $\Delta$ P<sub>*murA7*</sub>::TT *araC* P<sub>BAD</sub> *murA* mutation was verified by arabinose dependency for growth.

To construct a DNA vaccine vector, we first create a proper eukaryotic expression cassette in plasmid pVAX-1 by inserting a transcriptional terminator (*rrfG* TT: *aac tgc agt cta gat tat gcg aaa ggc cat cct gac gga tgg cct ttt tgt tta aac gga tcc gc*) at the HincII site so that expression in pUC origin (*ori*) domain does not affect the

transcriptional activities from P<sub>CMV</sub> promoter. The resulting plasmid was designated pYA3587. Then, a DNA fragment including pUC *ori*, *rrfG* TT, and a eukaryotic expression cassette from plasmid pYA3587 was inserted into the lysis vector pYA3681 (1) to replace the original pBR *ori* and a prokaryotic expression cassette using primers pVAX-SmaI-SalI and pVAX-SmaI-Call. This process resulted in DNA vaccine vector pYA3650. Then pYA3650 was introduced into the regulated delayed lysis host strain  $\chi$ 8888.

**Examination of Cell Lysis in Vitro.** Overnight cultures of strains grown in LB broth supplemented with 0.002% arabinose (0.002% arabinose was supplied to avoid accumulation of arabinose in bacteria to be able to detect cell lysis during the short incubation period) were diluted 1:400 into fresh prewarmed LB broth supplemented with or without 0.02% arabinose  $\beta$ -galactosidase activity in the supernatant and cell-pellet fractions were assayed at indicated time points as previously described (1, 11).

**Colonization of Mice with the *Salmonella* DNA Vaccine Strains.** All animal experiments were conducted as per protocols approved by the Arizona State University Institutional Animal Care and Use Committee. Mice were kept 1 wk after arrival to acclimate them to our animal facility before immunization. Each group of three inbred 7-wk-old female BALB/c mice (Charles Rivers Laboratories) were deprived of food and water for 4 h before oral administration of *Salmonella* vaccine strains. These strains were grown with aeration in LB broth supplemented with 0.2% arabinose to an optical density at 600 nm (OD<sub>600</sub>) of 0.85 from a nonaerated static overnight culture. Next,  $1.0 \times 10^9$  CFU of  $\chi$ 8888 (pYA3650) or other RASV strains in 20  $\mu$ L of PBS containing 0.01% gelatin (BSG) was orally administered to mice at the back of the mouth with a pipette tip. Food and water were returned to mice 30 min later. Mice were killed at indicated times and their Peyer's patches, spleens, and livers were collected aseptically. Tissues were homogenized and plated on LB agar with 0.2% arabinose to evaluate colonization and persistence, and onto LB agar plates without arabinose to confirm arabinose-dependent growth.

**Construction of Improved DNA Vaccine Vector Encoding WSN HA.** Plasmid pPolli-Wsn, all kindly provided by Yoshihiro Kawaoka (University of Wisconsin, Madison, WI) was used as the template for construction of pYA4545 encoding WSN HA. Primers KpnI-WSN HA and XhoI-WSN HA were used to amplify the DNA sequence of WSN HA gene. A DNA fragment encoding the WSN HA antigen with Kozak sequence was inserted downstream of the CMV promoter of the improved DNA vaccine vector pYA4545 at the KpnI/XhoI site to obtain plasmid pYA4859. We then introduced plasmid pYA4859 into  $\chi$ 9354 to yield  $\chi$ 9354(pYA4859).

**Cultured Cell Invasion and Survival Assay.** The method of Galan and Curtiss (11) was adapted and modified as follows. Monolayers of INT-407 cells (human embryonic intestine; ATCC CCL 6) were seeded at  $5 \times 10^5$  cells per well in a 24-well tissue culture plate in Eagle's MEM (EMEM) supplemented with 10% (vol/vol) FBS. The plates were incubated at 37 °C in a humidified, 5% (vol/vol) CO<sub>2</sub> incubator to obtain confluent monolayers. The cells were rinsed with EMEM-1% (vol/vol) FBS and inoculated with  $\sim 5 \times 10^6$  CFU of a bacterial suspension. To measure bacterial internalization, the tissue culture plates were centrifuged at 600  $\times$  g for 5 min, and incubated for 2 h at 37 °C in a humidified, 5% (vol/vol) CO<sub>2</sub> incubator. Then, the infected monolayers were rinsed three times with MEM-1% (vol/vol) FBS, and incubated

for an additional 3 h in MEM-1% (vol/vol) FBS containing 100  $\mu$ g/mL of gentamicin. For the bacterial survival assay, the infected monolayers were incubated a further 18 h in MEM-1% (vol/vol) FBS containing 10  $\mu$ g/mL of gentamicin. The epithelial cells lysed with a solution of 0.1% Triton X-100. The suspensions were serially diluted and the number of viable and internalized bacteria determined by counting the resultant colonies on LB agar plates. The reported values represent the mean counts  $\pm$  SD derived from triplicate wells.

**Examination of EGFP Synthesis Using Confocal Microscopy.** Next,  $5 \times 10^4$  cells of INT-407 and Vero (ATCC CCL-8), derived from the kidney of an African green monkey, were cultured on glass coverslips in the six-well plates for 18 h at 37 °C in a humidified, 5% (vol/vol) CO<sub>2</sub> incubator. The INT-407 and Vero cells were transfected with 1  $\mu$ g of the DNA vaccine vectors pYA4272 (pYA3650 encoding EGFP) and pYA4685 (pYA4545 encoding EGFP) using Lipofectamine 2000 according to the manufacturer's instructions (Invitrogen). Twenty hours after initiating the transfection, the cell monolayers were rinsed three times with PBS and stained with 5  $\mu$ M TO-PRO-3 iodide nuclear stain (Molecular Probes). Then, cells were washed with PBS and fixed with 3.0% (wt/vol) paraformaldehyde in 0.1 M phosphate buffer (pH 7.2). Stained cells were mounted using Vectashield mounting medium (Vector Laboratories) and stored at 4 °C in darkness before analysis. Slides were observed using a confocal epifluorescence microscope (Leica TCS SP2 Microsystems). Images were captured through the 20 $\times$  objective and analyzed using Leica Lite software (Leica Microsystems).

**Virus Strain Propagation, Purification, and Titration.** rWSN virus was provided by Andrew Pekosz (The Johns Hopkins University, Baltimore, MD). This virus is a mouse-adapted strain created by reverse genetics and is lethal to mice in doses above  $10^3$  TCID<sub>50</sub> (12, 13). The virus was propagated and titrated in Madin-Darby canine kidney cells cultured in RPMI-1640 (Gibco) containing 2  $\mu$ g/mL acetyl-trypsin (Sigma). The virus was passed through a 30% (wt/vol) sucrose cushion at 11,620  $\times$  g for 3 h in a Surespin Sorvall 630 rotor using a WK ultra 90 centrifuge (Thermo Electron). The resulting pellet was resuspended in PBS pH 7.2 and centrifuged at 11,620  $\times$  g for 1 h. The viral pellet was finally dissolved in 500  $\mu$ L of PBS and kept frozen at -80 °C until used.

**ELISA.** IgG responses against HA or LPS in sera were determined by ELISA (14). Briefly, 96-well flat-bottom polystyrene microtiter plates (Dynatech Laboratories) were coated with 100 ng per well of inactivated purified WSN virus or LPS (Sigma) suspended in carbonate coating buffer (pH 9.5) and incubated at 4 °C overnight. Free binding sites were blocked with PBS-0.05% Tween 20 containing 3% (wt/vol) BSA for 2 h at room temperature. Sera were serially diluted from an initial dilution of 1:50. A 100- $\mu$ L volume of diluted sample was added to duplicate wells and incubated for 1 h at room temperature. Plates were treated with biotinylated goat anti-mouse IgG (Southern Biotechnology). Wells were developed with streptavidin-alkaline phosphatase conjugate (Southern Biotechnology) followed by *p*-nitrophenyl phosphate (Sigma). Color development (absorbance) was recorded at 405 nm using an automated ELISA plate reader (SpectraMax; Molecular Devices). Endpoint titers were expressed as the reciprocal log<sub>2</sub> values of the last positive sample dilution. Absorbance reading two-times higher than preimmune serum baseline values was considered positive.

1. Kong W, et al. (2008) Regulated programmed lysis of recombinant *Salmonella* in host tissues to release protective antigens and confer biological containment. *Proc Natl Acad Sci USA* 105(27):9361–9366.

2. Ameiss K, et al. (2010) Delivery of woodchuck hepatitis virus-like particle presented influenza M2e by recombinant attenuated *Salmonella* displaying a delayed lysis phenotype. *Vaccine* 28(41):6704–6713.

- Ashraf S, Kong W, Wang S, Yang J, Curtiss R III (2011) Protective cellular responses elicited by vaccination with influenza nucleoprotein delivered by a live recombinant attenuated *Salmonella* vaccine. *Vaccine* 29(23):3990–4002.
- Bertani G (1951) Studies on lysogeny. I. The mode of phage liberation by lysogenic *Escherichia coli*. *J Bacteriol* 62(3):293–300.
- Nakayama K, Kelly SM, Curtiss R III (1988) Construction of an Asd<sup>+</sup> expression-cloning vector: Stable maintenance and high level expression of cloned genes in a *Salmonella* vaccine strain. *BioTechnology* 6:693–697.
- Gay P, Le Coq D, Steinmetz M, Berkelman T, Kado CI (1985) Positive selection procedure for entrapment of insertion sequence elements in gram-negative bacteria. *J Bacteriol* 164(2):918–921.
- Sambrook J, Fritsch EF, Maniatis T (1989) *Molecular Cloning: A Laboratory Manual* (Cold Spring Harbor Lab Press, Spring Cold Harbor, NY), 2nd ed Ed.
- Miller VL, Mekalanos JJ (1988) A novel suicide vector and its use in construction of insertion mutations: Osmoregulation of outer membrane proteins and virulence determinants in *Vibrio cholerae* requires *toxR*. *J Bacteriol* 170(6):2575–2583.
- Kang HY, Dozois CM, Tinge SA, Lee TH, Curtiss R III (2002) Transduction-mediated transfer of unmarked deletion and point mutations through use of counterselectable suicide vectors. *J Bacteriol* 184(1):307–312.
- Hitchcock PJ, Brown TM (1983) Morphological heterogeneity among *Salmonella* lipopolysaccharide chemotypes in silver-stained polyacrylamide gels. *J Bacteriol* 154(1):269–277.
- Galán JE, Curtiss R III (1989) Cloning and molecular characterization of genes whose products allow *Salmonella typhimurium* to penetrate tissue culture cells. *Proc Natl Acad Sci USA* 86(16):6383–6387.
- McCown MF, Pekosz A (2005) The influenza A virus M2 cytoplasmic tail is required for infectious virus production and efficient genome packaging. *J Virol* 79(6):3595–3605.
- McCown MF, Pekosz A (2006) Distinct domains of the influenza A virus M2 protein cytoplasmic tail mediate binding to the M1 protein and facilitate infectious virus production. *J Virol* 80(16):8178–8189.
- Doherty PC, Kelso A (2008) Toward a broadly protective influenza vaccine. *J Clin Invest* 118(10):3273–3275.

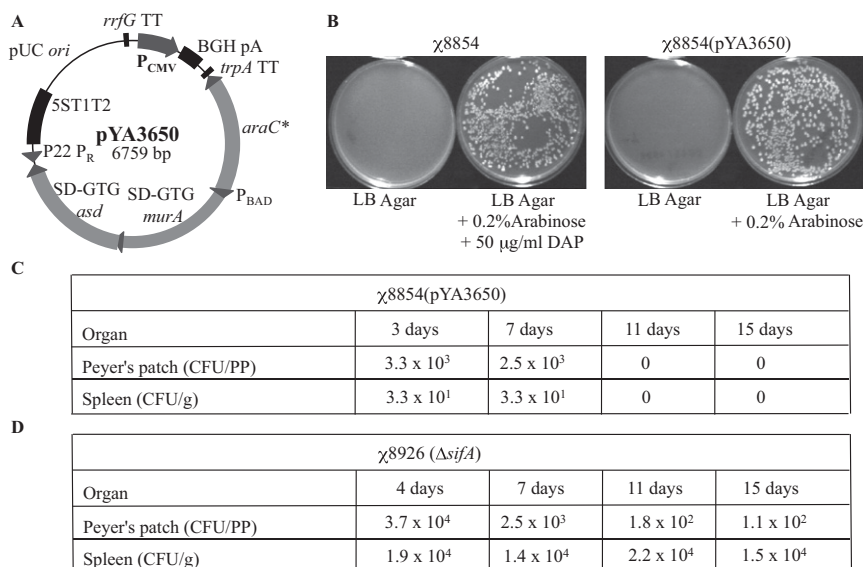

**Fig. S1.** In vitro and in vivo lysis of programmed lysis system in the absence of arabinose. (A) Map of plasmid pYA3650. Plasmid sequences include the *rrfG*, *trpA*, and 5S ribosomal RNA transcriptional terminators, the  $P_{BAD}$ ,  $P_{22 P_R}$  and  $P_{CMV}$  promoters, the *araC* gene, and start codon-modified *murA* and *asdA* genes. (B) Growth of *Salmonella* strains  $\chi_{8854}$  and  $\chi_{8854}(pYA3650)$  with and without arabinose on the indicated plates. (C) Colonization of mice with *S. Typhimurium*  $\chi_{8854}$  ( $pYA3650$ ) following oral inoculation with  $10^9$  CFU bacteria. (D) Colonization of mice with *S. Typhimurium*  $\chi_{8926}$  following oral inoculation with  $10^9$  CFU bacteria.

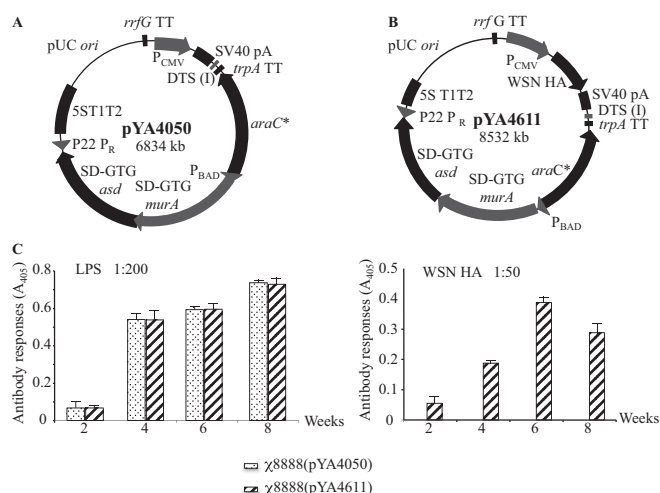

**Fig. S2.** Efficacy evaluation of DNA vaccine. (A) Map of plasmid pYA4050. Plasmid sequences of pYA4050 include the *rrfG*, *trpA*, and 5S ribosomal RNA transcriptional terminators, the  $P_{BAD}$ ,  $P_{22 P_R}$  and  $P_{CMV}$  promoters, the *araC* gene, and start codon-modified *murA* and *asdA* genes, DNA nuclear targeting sequences (DTS) (I), and SV40 late poly(A). (B) Map of plasmid pYA4611. This plasmid was created by insertion of WSN HA into pYA4050. (C) Immune responses in mice after oral primary immunization and one boost dose with RASV strains  $\chi_{8888}(pYA4050)$  (vector control) and  $\chi_{8888}(pYA4611)$ . Induction of IgG titers against purified *S. Typhimurium* LPS (Left) and inactivated influenza WSN virus (Right) detected by ELISA. Pooled serum samples ( $n = 5$ ) from mice within a group were assayed and analyzed by ANOVA followed by Tukey's range test.

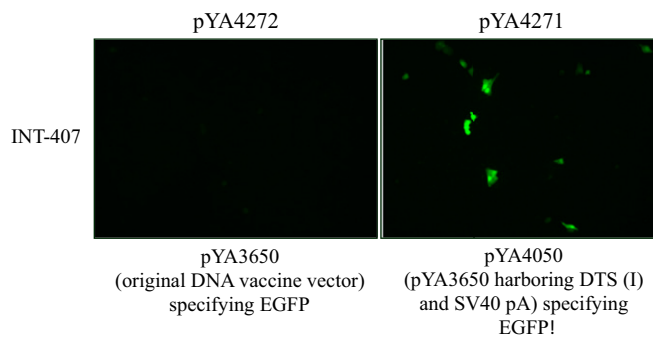

**Fig. S3.** Fluorescence imaging of EGFP (green signals) synthesis by DNA vaccine vector pYA3650 (original) (Left) and pYA4050 [improved by insertion of DTS (I) and SV40 late polyA into pYA3650] (Right) in INT-407 cells. One microgram plasmid DNA was transfected into INT-407 cell by using transfection reagent Lipofectamine, the fluorescence of EGFP was visualized using a microscope (Zeiss Axioskop 40, objective 10 $\times$ ) at 20 h posttransfection.

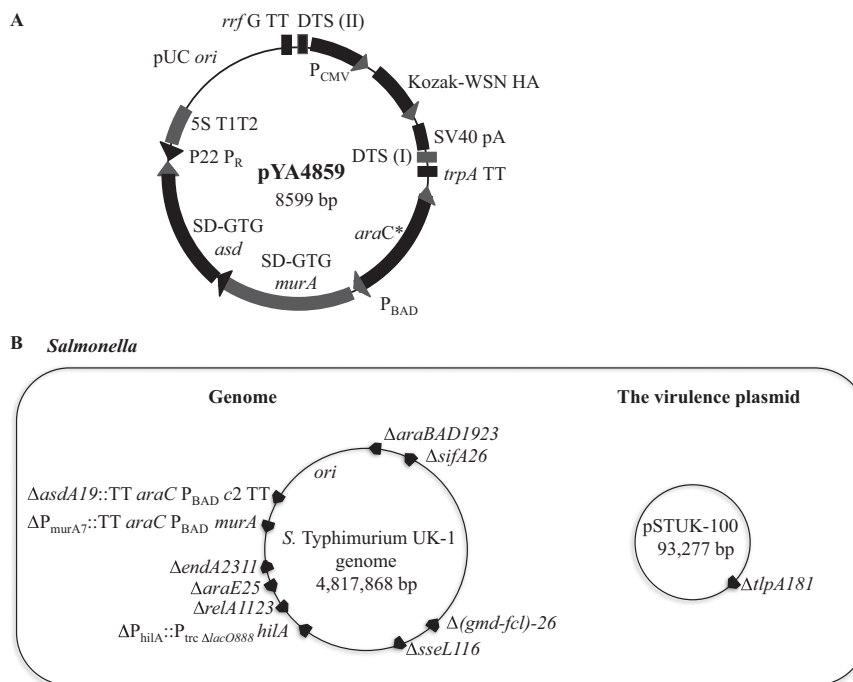

**Fig. S4.** Regulated delayed lysis system for WSN HA delivery by DNA vaccine. (A) Maps of plasmid pYA4859. Plasmid sequences of pYA4859 include the *rrfG*, *trpA*, and 5S ribosomal RNA transcriptional terminators, the  $P_{BAD}$ ,  $P_{22 P_R}$ , and  $P_{CMV}$  promoters, the *araC* gene, and start codon-modified *murA* and *asdA* genes, DTS (I), DTS (II), SV40 late poly(A), and WSN HA gene. (B) The defined deletion chromosomal mutations and locations in the genome of strain  $\chi$ 11218. P, promoter; TT, transcriptional terminator.



**Table S1. Bacterial strains and plasmids used in this study**

| Strain or plasmid          | Description                                                                                                                                                                                                                                                                                                                                      | Source        |
|----------------------------|--------------------------------------------------------------------------------------------------------------------------------------------------------------------------------------------------------------------------------------------------------------------------------------------------------------------------------------------------|---------------|
| <b>S. Typhimurium UK-1</b> |                                                                                                                                                                                                                                                                                                                                                  |               |
| χ3761                      | Wild-type                                                                                                                                                                                                                                                                                                                                        | (1)           |
| χ8806                      | Δ <i>asdA19</i> ::TT <i>araC</i> P <sub>BAD</sub> c2 TT ΔP <sub>murA7</sub> ::TT <i>araC</i> P <sub>BAD</sub> <i>murA</i>                                                                                                                                                                                                                        | Present study |
| χ8807                      | Δ <i>asdA19</i> ::TT <i>araC</i> P <sub>BAD</sub> c2 TT ΔP <sub>murA7</sub> ::TT <i>araC</i> P <sub>BAD</sub> <i>murA</i> Δ <i>araBAD1923</i> Δ <i>araE25</i>                                                                                                                                                                                    | Present study |
| χ8854                      | Δ <i>asdA19</i> ::TT <i>araC</i> P <sub>BAD</sub> c2 TT ΔP <sub>murA7</sub> ::TT <i>araC</i> P <sub>BAD</sub> <i>murA</i> Δ <i>araBAD1923</i> Δ <i>araE25</i> Δ <i>endA2311</i>                                                                                                                                                                  | Present study |
| χ8888                      | Δ <i>asdA19</i> ::TT <i>araC</i> P <sub>BAD</sub> c2 TT ΔP <sub>murA7</sub> ::TT <i>araC</i> P <sub>BAD</sub> <i>murA</i> Δ <i>araBAD1923</i> Δ <i>araE25</i> Δ <i>endA2311</i><br>Δ( <i>gmd-fcl</i> )-26 Δ <i>relA1123</i>                                                                                                                      | (2)           |
| χ8933                      | Δ <i>asdA19</i> ::TT <i>araC</i> P <sub>BAD</sub> c2 TT ΔP <sub>murA7</sub> ::TT <i>araC</i> P <sub>BAD</sub> <i>murA</i> Δ <i>araBAD1923</i> Δ <i>araE25</i> Δ <i>endA2311</i><br>Δ( <i>gmd-fcl</i> )-26 Δ <i>relA1123</i> Δ <i>atrB13</i> ::MudJ                                                                                               | Present study |
| χ9354                      | Δ <i>asdA19</i> ::TT <i>araC</i> P <sub>BAD</sub> c2 TT ΔP <sub>murA7</sub> ::TT <i>araC</i> P <sub>BAD</sub> <i>murA</i> Δ <i>araBAD1923</i> Δ <i>araE25</i> Δ <i>endA2311</i><br>Δ( <i>gmd-fcl</i> )-26 Δ <i>relA1123</i> Δ <i>sifA26</i>                                                                                                      | Present study |
| χ9923                      | Δ <i>tlpA181</i>                                                                                                                                                                                                                                                                                                                                 | Present study |
| χ9924                      | Δ <i>sseL116</i>                                                                                                                                                                                                                                                                                                                                 | Present study |
| χ9971                      | ΔP <sub>hilA</sub> ::P <sub>trc</sub> Δ <i>lacO888</i> <i>hilA</i>                                                                                                                                                                                                                                                                               | Present study |
| χ11214                     | Δ <i>asdA19</i> ::TT <i>araC</i> P <sub>BAD</sub> c2 TT ΔP <sub>murA7</sub> ::TT <i>araC</i> P <sub>BAD</sub> <i>murA</i> Δ <i>araBAD1923</i> Δ <i>araE25</i> Δ <i>endA2311</i><br>Δ( <i>gmd-fcl</i> )-26 Δ <i>relA1123</i> Δ <i>sifA26</i> ΔP <sub>hilA</sub> ::P <sub>trc</sub> Δ <i>lacO888</i> <i>hilA</i>                                   | Present study |
| χ11215                     | Δ <i>asdA19</i> ::TT <i>araC</i> P <sub>BAD</sub> c2 TT ΔP <sub>murA7</sub> ::TT <i>araC</i> P <sub>BAD</sub> <i>murA</i> Δ <i>araBAD1923</i> Δ <i>araE25</i> Δ <i>endA2311</i><br>Δ( <i>gmd-fcl</i> )-26 Δ <i>relA1123</i> Δ <i>sifA26</i> Δ <i>tlpA181</i> Δ <i>sseL116</i>                                                                    | Present study |
| χ11218                     | Δ <i>asdA19</i> ::TT <i>araC</i> P <sub>BAD</sub> c2 TT ΔP <sub>murA7</sub> ::TT <i>araC</i> P <sub>BAD</sub> <i>murA</i> Δ <i>araBAD1923</i> Δ <i>araE25</i> Δ <i>endA2311</i><br>Δ( <i>gmd-fcl</i> )-26 Δ <i>relA1123</i> Δ <i>sifA26</i> Δ <i>tlpA181</i> Δ <i>sseL116</i> ΔP <sub>hilA</sub> ::P <sub>trc</sub> Δ <i>lacO888</i> <i>hilA</i> | Present study |
| <b>E. coli K-12</b>        |                                                                                                                                                                                                                                                                                                                                                  |               |
| MGN-617                    | <i>thi-1 thr-1 leuB6 fhuA21 lacY1 glnV44 asdA4 recA1</i> RP4 2-Tc::Mu [ <i>pir</i> ]                                                                                                                                                                                                                                                             | (3)           |
| χ289                       | <i>glnV42 λ<sup>-</sup> T3<sup>f</sup></i>                                                                                                                                                                                                                                                                                                       | (4)           |
| <b>Recombinant plasmid</b> |                                                                                                                                                                                                                                                                                                                                                  |               |
| pVAX-1                     | A 3.0-kb plasmid vector designed for use in the development of DNA vaccines                                                                                                                                                                                                                                                                      | Invitrogen    |
| pYA3587                    | pVAX-1 with <i>rrfGTT</i> at <i>HincII</i> site                                                                                                                                                                                                                                                                                                  | Present study |
| pYA3650                    | pUC <i>ori araC*</i> P <sub>BAD</sub> SD-GTG <i>murA</i> SD-GTG <i>asdA</i> P22 P <sub>R</sub> anti-sense mRNA eukaryotic expression cassette                                                                                                                                                                                                    | Present study |
| pYA3681                    | pBR <i>ori araC*</i> P <sub>BAD</sub> SD-GTG <i>asdA</i> SD-GTG <i>murA</i> P22 P <sub>R</sub> anti-sense mRNA prokaryotic expression cassette                                                                                                                                                                                                   | (5)           |
| pYA3836                    | pUC <i>ori araC*</i> P <sub>BAD</sub> SD-GTG <i>murA</i> SD-GTG <i>asdA</i> P22 P <sub>R</sub> anti-sense mRNA eukaryotic expression cassette with DTS (I)                                                                                                                                                                                       | Present study |
| pYA4050                    | pUC <i>ori araC*</i> P <sub>BAD</sub> SD-GTG <i>murA</i> SD-GTG <i>asdA</i> P22 P <sub>R</sub> anti-sense mRNA eukaryotic expression cassette with DTS (I) and SV 40 polyA                                                                                                                                                                       | Present study |
| pYA4271                    | pUC <i>ori araC*</i> P <sub>BAD</sub> SD-GTG <i>murA</i> SD-GTG <i>asdA</i> P22 P <sub>R</sub> anti-sense mRNA eukaryotic expression cassette of EGFP with DTS (I) and SV 40 polyA                                                                                                                                                               | Present study |
| pYA4272                    | pUC <i>ori araC*</i> P <sub>BAD</sub> SD-GTG <i>murA</i> SD-GTG <i>asdA</i> P22 P <sub>R</sub> anti-sense mRNA eukaryotic expression cassette of EGFP                                                                                                                                                                                            | Present study |
| pYA4545                    | pUC <i>ori araC*</i> P <sub>BAD</sub> SD-GTG <i>murA</i> SD-GTG <i>asdA</i> P22 P <sub>R</sub> anti-sense mRNA eukaryotic expression cassette of with DTS (I), DTS (II) and SV 40 polyA                                                                                                                                                          | Present study |
| pYA4611                    | pUC <i>ori araC*</i> P <sub>BAD</sub> SD-GTG <i>murA</i> SD-GTG <i>asdA</i> P22 P <sub>R</sub> anti-sense mRNA eukaryotic expression cassette of WSN-HA with DTS (I) and SV 40 polyA                                                                                                                                                             | Present study |
| pYA4685                    | pUC <i>ori araC*</i> P <sub>BAD</sub> SD-GTG <i>murA</i> SD-GTG <i>asdA</i> P22 P <sub>R</sub> anti-sense mRNA eukaryotic expression cassette of EGFP with DTS (I), DTS (II) and SV 40 polyA                                                                                                                                                     | Present study |
| pYA4859                    | pUC <i>ori araC*</i> P <sub>BAD</sub> SD-GTG <i>murA</i> SD-GTG <i>asdA</i> P22 P <sub>R</sub> anti-sense mRNA eukaryotic expression cassette of WSN-HA with DTS (I), DTS (II) and SV 40 polyA                                                                                                                                                   | Present study |
| <b>Suicide vector</b>      |                                                                                                                                                                                                                                                                                                                                                  |               |
| pYA3484                    | Δ <i>araBAD1923</i>                                                                                                                                                                                                                                                                                                                              | (6)           |
| pYA3485                    | Δ <i>araE25</i>                                                                                                                                                                                                                                                                                                                                  | (6)           |
| pYA3629                    | Δ( <i>gmd-fcl</i> )-26                                                                                                                                                                                                                                                                                                                           | (6)           |
| pYA3652                    | Δ <i>endA2311</i>                                                                                                                                                                                                                                                                                                                                | (6)           |
| pYA3679                    | Δ <i>relA1123</i>                                                                                                                                                                                                                                                                                                                                | (6)           |
| pYA3716                    | Δ <i>sifA26</i>                                                                                                                                                                                                                                                                                                                                  | (7)           |
| pYA4620                    | Δ <i>tlpA181</i>                                                                                                                                                                                                                                                                                                                                 | Present study |
| pYA4621                    | Δ <i>sseL116</i>                                                                                                                                                                                                                                                                                                                                 | Present study |
| pYA4641                    | ΔP <sub>hilA</sub> ::P <sub>trc</sub> Δ <i>lacO888</i> <i>hilA</i><br><i>araC*</i> P <sub>BAD</sub> from χ289                                                                                                                                                                                                                                    | Present study |

- Curtiss R III, et al. (1991) *Colonization Control of Human Bacterial Enteropathogens in Poultry* (Academic, New York).
- Ameiss K, et al. (2010) Delivery of woodchuck hepatitis virus-like particle presented influenza M2e by recombinant attenuated *Salmonella* displaying a delayed lysis phenotype. *Vaccine* 28(41):6704–6713.
- Roland K, Curtiss R III, Sizemore D (1999) Construction and evaluation of a delta *cya* delta *crp* *Salmonella typhimurium* strain expressing avian pathogenic *Escherichia coli* O78 LPS as a vaccine to prevent airsacculitis in chickens. *Avian Dis* 43(3):429–441.
- Curtiss R III, Charamella LJ, Berg CM, Harris PE (1965) Kinetic and genetic analyses of D-cycloserine inhibition and resistance in *Escherichia coli*. *J Bacteriol* 90(5):1238–1250.

5. Kong W, et al. (2008) Regulated programmed lysis of recombinant *Salmonella* in host tissues to release protective antigens and confer biological containment. *Proc Natl Acad Sci USA* 105(27):9361–9366.
6. Curtiss R III, et al. (2010) New technologies in using recombinant attenuated *Salmonella* vaccine vectors. *Crit Rev Immunol* 30(3):255–270.
7. Ashraf S, Kong W, Wang S, Yang J, Curtiss R III (2011) Protective cellular responses elicited by vaccination with influenza nucleoprotein delivered by a live recombinant attenuated *Salmonella* vaccine. *Vaccine* 29(23):3990–4002.

**Table S2. Primers used in this study**

| Primer name                                                                   | Sequence                                                                                                                                                                                              |
|-------------------------------------------------------------------------------|-------------------------------------------------------------------------------------------------------------------------------------------------------------------------------------------------------|
| <b>Construction of plasmid pYA3650</b>                                        |                                                                                                                                                                                                       |
| Synthetic <i>rrfG</i> TT                                                      |                                                                                                                                                                                                       |
| <i>rrfG</i> TT                                                                | aac tgc agt cta gat tat gcg aaa ggc cat cct gac gga tgg cct ttt tgt tta aac gga tcc gc                                                                                                                |
| Insertion of pUC <i>ori-rrfG</i> TT- $P_{CMV}$ -BGH polyA cassette            |                                                                                                                                                                                                       |
| pVAX-SmaI-SalI                                                                | gca ccc ggg tcg aca gat cct tggcggcgagaaag                                                                                                                                                            |
| pVAX-SmaI-Call                                                                | cgacccgggatcgatctgtgctggtatttcacaccg                                                                                                                                                                  |
| <b>Construction of plasmid pYA3836</b>                                        |                                                                                                                                                                                                       |
| Insertion of DTS (I) fragment                                                 |                                                                                                                                                                                                       |
| SphI-SV40 second                                                              | aca tgc atg caa cca gct gtg gaa tgt gtg tca gtt agg gtg tgg aaa gtc ccc agg ctg ccc agc agg ca                                                                                                        |
| PfIMI- <i>araC</i> -SV40                                                      | cgc cat ctg gtg gcg ggt tta acg ccg att gag gcc a                                                                                                                                                     |
| <b>Construction of plasmid pYA4050</b>                                        |                                                                                                                                                                                                       |
| Insertion of SV40 late polyA fragment                                         |                                                                                                                                                                                                       |
| XhoI-SV40 polyA                                                               | ccg ctg gag aat gct tcg agc aga cat gat aag ata cat tga tga gtt tgg aca                                                                                                                               |
| SphI-SV40 polyA                                                               | aca tgc atg ccc cgg atc gat cct tat cgg att tta cca cat ttg tag agg ttt tac ttg c                                                                                                                     |
| <b>Construction of plasmids of pYA4272 and pYA4685</b>                        |                                                                                                                                                                                                       |
| Insertion of EGFP fragment                                                    |                                                                                                                                                                                                       |
| KpnI-EGFP                                                                     | ggg gta cca gga gcc gcc acc atg gtg agc aag ggc gag gag ctg                                                                                                                                           |
| XhoI-EGFP                                                                     | ccg ctg gag tta ctt gta cag ctg gtc cat gc                                                                                                                                                            |
| <b>Construction of plasmid pYA4545</b>                                        |                                                                                                                                                                                                       |
| DTS (II) cassette                                                             |                                                                                                                                                                                                       |
| DTS (II)                                                                      | ggg gac ttt ccg ggg act ttc ctg ccc acg cgg ggg act ttc cgc cac ggg cgg gga ctt tcc ggg gac ttt cc                                                                                                    |
| Insertion of DTS (II) fragment                                                |                                                                                                                                                                                                       |
| PmlI-DTS up-1                                                                 | ccg gca cgt gct aaa act tca ttt tta att taa aag g                                                                                                                                                     |
| DTS up-2                                                                      | gcc cgt ggc gga aag tcc ccc cgc tgg gga gga aag tcc ccg gaa agt ccc cta atg acc ccg taa ttg att act att<br>ggg gac ttt ccg cca cgg gcg ggg act ttc cgg gga ctt tcc gtt cat agc cca tat atg gag ttc cg |
| KpnI-DTS down-2                                                               | cgg ggt acc aag ctt aag ttt aaa cgc ta                                                                                                                                                                |
| <b>Construction of plasmids of pYA4611 and pYA4859</b>                        |                                                                                                                                                                                                       |
| Insertion of WSN HA gene                                                      |                                                                                                                                                                                                       |
| KpnI-WSN HA                                                                   | ggg gta cca gga gcc gcc acc atg gct aag gca aaa cta ctg gtc ctg t                                                                                                                                     |
| XhoI-WSN HA                                                                   | ccg ctg gag tca gat gca tat tct gca ctg c                                                                                                                                                             |
| <b>Construction of suicide vector</b>                                         |                                                                                                                                                                                                       |
| <b>pYA4620 (<math>\Delta t/pA181</math>)</b>                                  |                                                                                                                                                                                                       |
| HindIII- <i>t/pA</i> up-1                                                     | ccc aag ctt gcc ctg cct gtc gaa aag atg agc g                                                                                                                                                         |
| <i>t/pA</i> up-2                                                              | gag ctg ggt acc agc ctg cag gca tgc ctg tca gtc tcc gca taa agg ggt a                                                                                                                                 |
| <i>t/pA</i> down-1                                                            | gca tgc ctg cag gct ggt acc gag ctg tga tga caa ttc aga cgc ctg tga t                                                                                                                                 |
| EcoRI- <i>t/pA</i> down-2                                                     | cgg gaa ttc ctg tca taa cgg cgt cag tga cgg c                                                                                                                                                         |
| <b>pYA4621 (<math>\Delta sseL116</math>)</b>                                  |                                                                                                                                                                                                       |
| HindIII- <i>sseL</i> up-1                                                     | ccc aag ctt ctg cga aca ccc cat tac gct act g                                                                                                                                                         |
| <i>sseL</i> up-2                                                              | gag ctg ggt acc agc ctg cag gca tgc ctg ttc tgt ata taa gct gtg aaa t                                                                                                                                 |
| <i>sseL</i> down-1                                                            | gca tgc ctg cag gct ggt acc gag ctg tgg tga gta ctt aga gcc tat ccc a                                                                                                                                 |
| EcoRI- <i>sseL</i> down-2                                                     | cgg gaa ttc ttg aag cgt gta ttt atc gta ttc g                                                                                                                                                         |
| <b>pYA4641 (<math>\Delta P_{hilA}::P_{trc} \Delta lacO_{888} hilA</math>)</b> |                                                                                                                                                                                                       |
| HindIII- $P_{trc} 888$ up-1                                                   | ccc aag ctt cat ttt ttg tat ctg tca ctt aag t                                                                                                                                                         |
| $P_{trc} 888$ up-2                                                            | gag ctg ggt acc cgg cct gca ggc atg cac aca tta tac gag ccg gat gat taa ttg tca aca gct cat ttc aga atg<br>ata tgc tct ttt ctt tac tcc                                                                |
| $P_{trc} 888$ down-1                                                          | gca tgc ctg cag gcc ggg tac cga gct cca cac agg aaa cag acc atg cca cat ttt aat cct gtt cct gta t                                                                                                     |
| BamHI- $P_{trc} 888$ down-2                                                   | cgc gga tcc cag ttc ttc gta atg gtc acc ggc a                                                                                                                                                         |
